# Supplementary material for: Double Doping of a Low-Ionization-Energy Polythiophene with a Molybdenum Dithiolene Complex
Source: PubMed Central journal article supplement (PMC9245179; doi:10.1021/acs.chemmater.2c01040), 2022-06-13
Supplement: cm2c01040_si_001.pdf [file cm2c01040_si_001.pdf]

## Supporting information

### **Double doping of a low-ionization energy polythiophene with a molybdenum dithiolene complex**

Emmy Järsvall,<sup>a</sup> Till Biskup,<sup>b</sup> Yadong Zhang,<sup>c,d</sup> Renee Kroon,<sup>a,e</sup> Stephen Barlow,<sup>c,d</sup> Seth R. Marder,<sup>c,d,f</sup>

Christian Müller<sup>a\*</sup>

<sup>a</sup>Department of Chemistry and Chemical Engineering, Chalmers University of Technology, 41296 Göteborg, Sweden

<sup>b</sup>Physical Chemistry, University of Saarland, Saarbrücken 66123, Germany

<sup>c</sup>Georgia Institute of Technology, School of Chemistry and Biochemistry and Center for Organic Photonics and Electronics, Atlanta, Georgia 30332-0400, United States

<sup>d</sup>Renewable and Sustainable Energy Institute, University of Colorado Boulder, Boulder, CO 80303, United States

<sup>e</sup>Laboratory of Organic Electronics, Linköping University, 60174 Norrköping, Sweden

<sup>f</sup>Departments of Chemical and Biological Engineering and of Chemistry, University of Colorado Boulder, Boulder, CO 80303, United States

\*e-mail: [christian.muller@chalmers.se](mailto:christian.muller@chalmers.se)

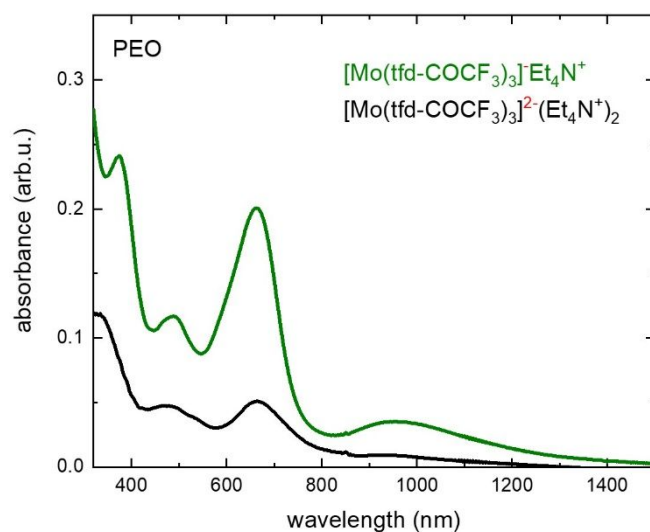

**Figure S1.** UV-vis spectra of  $[\text{Mo}(\text{tfd-COCF}_3)_3]\cdot\text{Et}_4\text{N}^+$  and  $[\text{Mo}(\text{tfd-COCF}_3)_3]_2\cdot(\text{Et}_4\text{N}^+)_2$  dispersed in a PEO matrix.

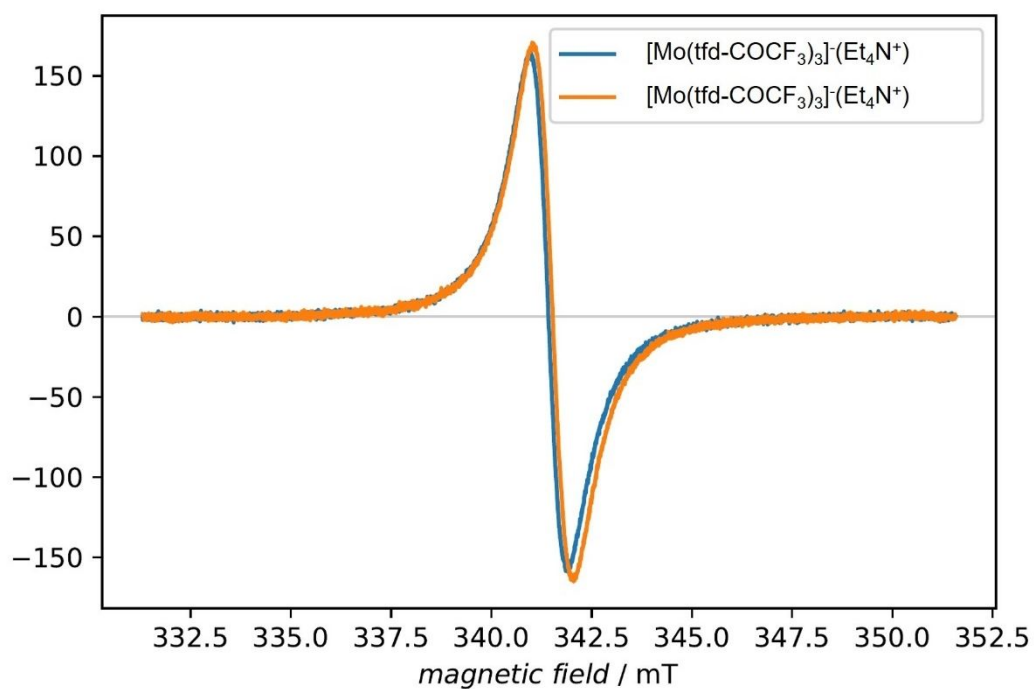

**Figure S2.** EPR spectra of a thin film of  $[\text{Mo}(\text{tfd-COCF}_3)_3]\cdot\text{Et}_4\text{N}^+$  dispersed in a PEO matrix recorded at  $0^\circ$  and  $90^\circ$ .

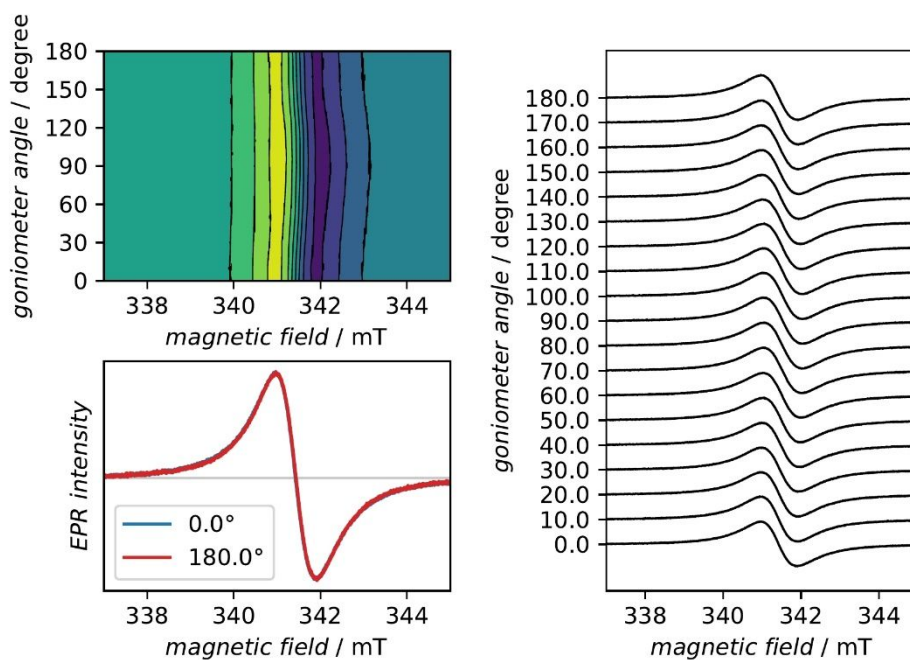

**Figure S3.** Angular-dependent EPR spectra of a thin film of  $[\text{Mo}(\text{tfd-COCF}_3)_3] \cdot \text{Et}_4\text{N}^+$  dispersed in a PEO matrix. Spectra have been recorded using a motorized goniometer with an accuracy of  $0.125^\circ$ . The sample has been manually positioned within the spectrometer initially with the substrate plane parallel to the magnetic field (with an accuracy of  $\pm 5^\circ$ ).

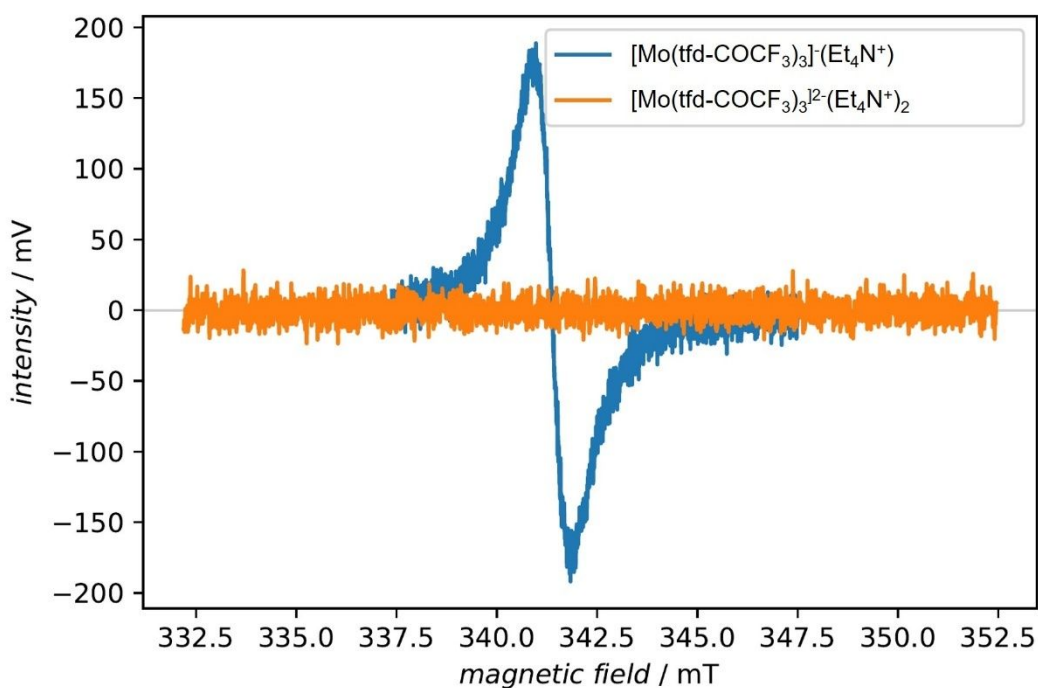

**Figure S4.** Non-smoothed EPR spectra of  $[\text{Mo}(\text{tfd-COCF}_3)_3] \cdot \text{Et}_4\text{N}^+$  and  $[\text{Mo}(\text{tfd-COCF}_3)_3]_2 \cdot (\text{Et}_4\text{N}^+)_2$  dispersed in a PEO matrix.

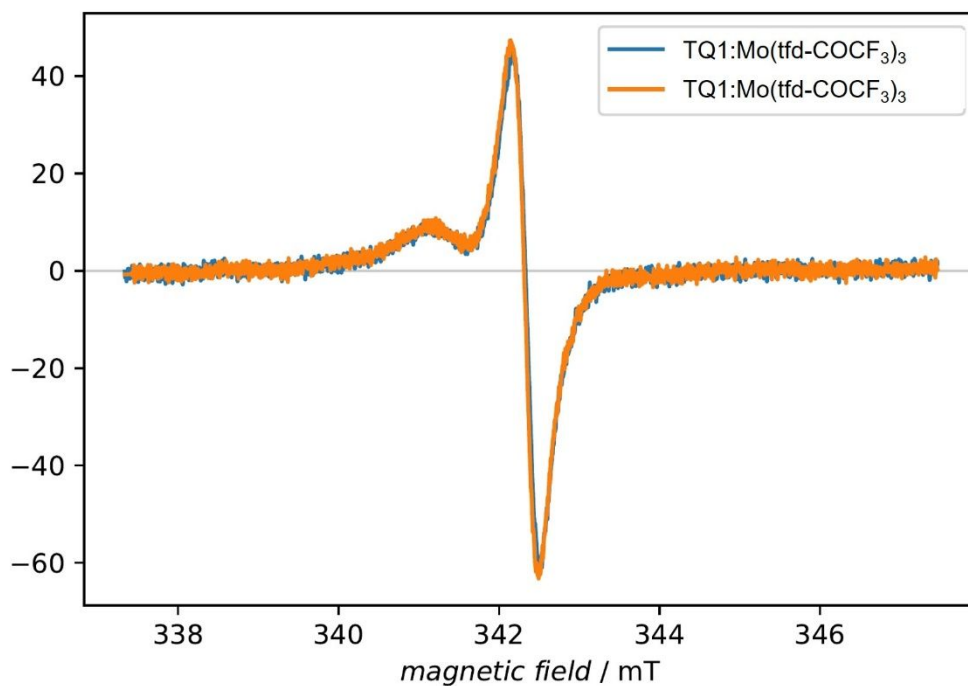

**Figure S5.** EPR spectra of TQ1 sequentially doped with Mo(tfd-COCF<sub>3</sub>)<sub>3</sub> recorded at 0° and 90°.

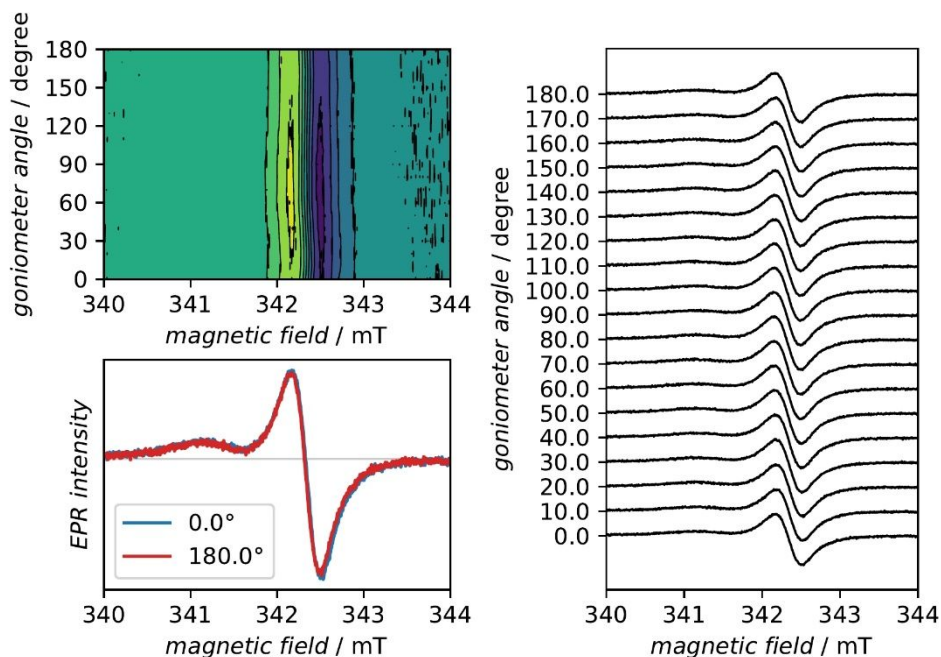

**Figure S6.** Angular-dependent EPR spectra of a TQ1 sequentially doped with Mo(tfd-COCF<sub>3</sub>)<sub>3</sub>. Spectra have been recorded using a motorized goniometer with an accuracy of 0.125°. The sample has been manually positioned within the spectrometer initially with the substrate plane parallel to the magnetic field (with an accuracy of ±5°).

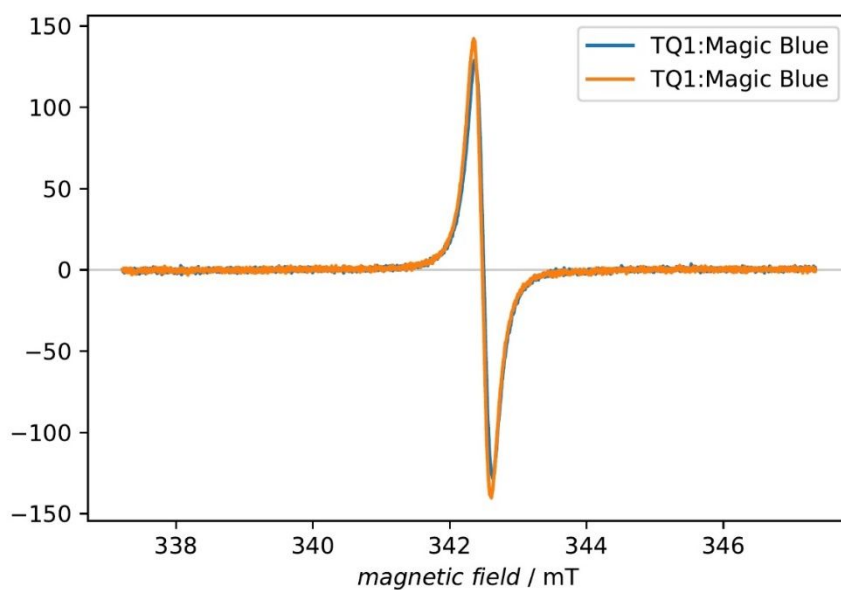

**Figure S7.** EPR spectra of TQ1 sequentially doped with Magic Blue recorded at 0° and 90°.

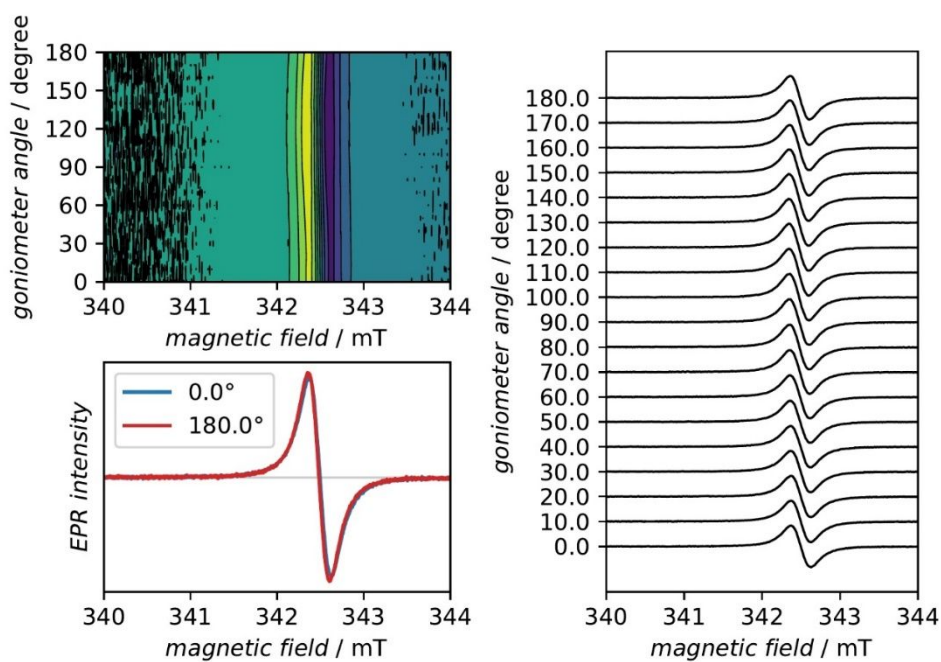

**Figure S8.** Angular-dependent EPR spectra of a TQ1 sequentially doped with Magic Blue. Spectra have been recorded using a motorized goniometer with an accuracy of 0.125°. The sample has been manually positioned within the spectrometer initially with the substrate plane parallel to the magnetic field (with an accuracy of  $\pm 5^\circ$ ).

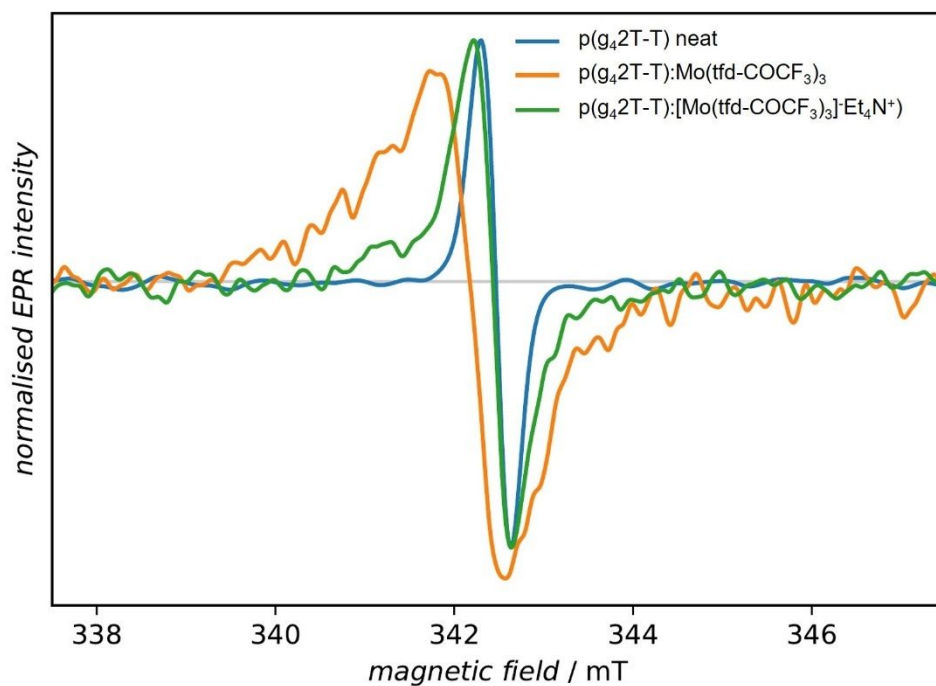

**Figure S9.** Non-smoothed EPR spectra of neat p(g<sub>4</sub>2T-T) and p(g<sub>4</sub>2T-T) sequentially doped with Mo(tfd-COCF<sub>3</sub>)<sub>3</sub> and [Mo(tfd-COCF<sub>3</sub>)<sub>3</sub>]<sup>-</sup>Et<sub>4</sub>N<sup>+</sup>.

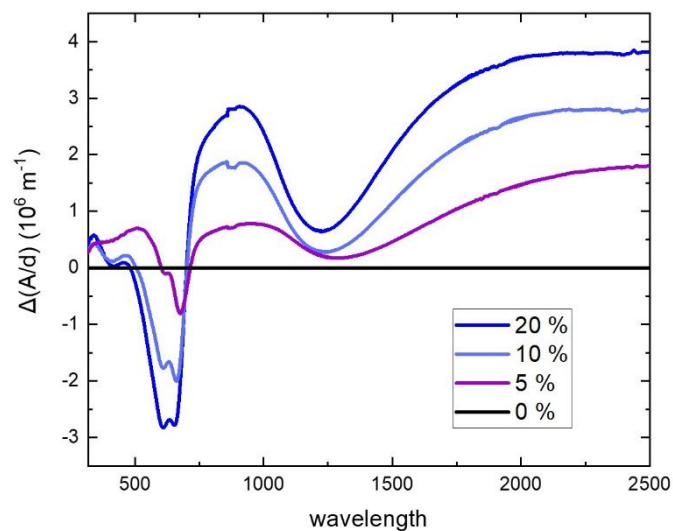

**Figure S10.** UV-vis-NIR absorbance spectra displaying the difference in thickness-normalized absorbance Δ(A/d) between the spectra of neat p(g<sub>4</sub>2T-T) and p(g<sub>4</sub>2T-T) co-processed with 5 mol%, 10 mol% and 20 mol% of Mo(tfd-COCF<sub>3</sub>)<sub>3</sub>.

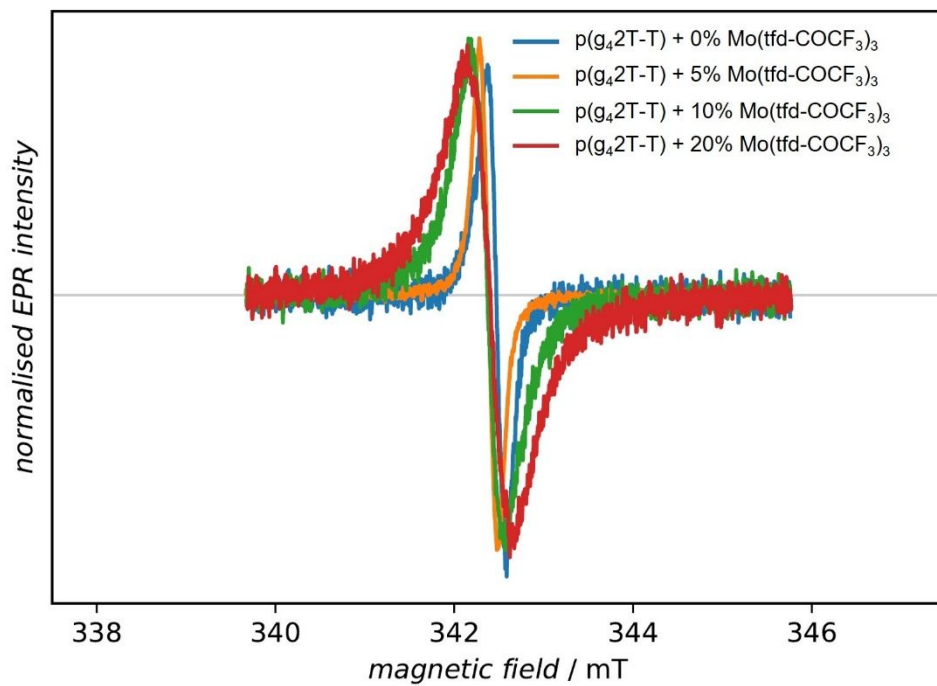

**Figure S11.** Non-smoothed EPR spectra of co-processed p(g<sub>4</sub>2T-T):Mo(tfd-COCF<sub>3</sub>)<sub>3</sub> films.
